# Supplementary material for: Health Information–Seeking Behavior of Seniors Who Use the Internet: A Survey
Source: PubMed Central journal article supplement (PMC4296102; doi:10.2196/jmir.3749), 2015-01-08
Supplement: jmir_v17i1e10_app1.pdf [file jmir_v17i1e10_app1.pdf]

As a patient you can choose the care that best fits your personal situation, but only if you have the right information to make a good decision. The purpose of this survey is to learn how seniors and their caregivers stay informed about their health – both general health information (such as tips for staying healthy), and how you look for answers to specific questions or information about health problems. Then we will know how to best reach you and other seniors with important information about health.

### Section 1: demographics and general health

Your information is analyzed anonymously and cannot be used to identify individuals.

- |                                                                                                                                                                                |                                                                                                            |
|--------------------------------------------------------------------------------------------------------------------------------------------------------------------------------|------------------------------------------------------------------------------------------------------------|
| Year of birth                                                                                                                                                                  | _____                                                                                                      |
| Gender                                                                                                                                                                         | M   F                                                                                                      |
| Postcode (numbers only)                                                                                                                                                        | _____                                                                                                      |
| Highest education level                                                                                                                                                        | primary school   high school   vocational/housekeeping   associate's degree   bachelor   university/master |
| Country of birth                                                                                                                                                               | _____                                                                                                      |
| Marital status                                                                                                                                                                 | married   divorced   widowed   cohabitating   single                                                       |
| Housing status                                                                                                                                                                 | cohabitating (partner   friend   family)   living alone   nursing home                                     |
| <sup>D</sup> Are you the primary caretaker for someone with a serious or chronic health condition?                                                                             | yes   no                                                                                                   |
| <sup>I</sup> In general, how is your health?                                                                                                                                   | very good   good   fair   bad   very bad                                                                   |
| <sup>E</sup> I can make an appointment for routine care (e.g. with my primary care doctor) as soon as I want                                                                   | strongly agree   agree   disagree   strongly disagree                                                      |
| <sup>E</sup> Rating of all health care received in the last 12 months:<br>1.....2.....3.....4.....5.....5.....6.....7.....8.....10<br>unacceptable.....average.....outstanding |                                                                                                            |

### Section 2: API

The questions for the Autonomy Preference Index were drawn from Simon et al.<sup>J</sup>, which were in turn based on Ende et al.<sup>K</sup>

### Section 3: Sources of health information

Health information is information about preventative care (such as vaccinations or good nutrition), specific conditions (such as diabetes or cancer), and medications or other forms of treatment. This section is about the ways you stay informed about your health.

#### <sup>D</sup> How much of your health information do you get from each of the following sources:

- |                                                                            |                                |
|----------------------------------------------------------------------------|--------------------------------|
| <sup>D,I</sup> direct contact with a health professional                   | a lot   some   a little   none |
| <sup>D,I</sup> pharmacy                                                    | a lot   some   a little   none |
| <sup>C</sup> leaflets at the doctor's office (such as in the waiting room) | a lot   some   a little   none |
| <sup>C</sup> telephone help line                                           | a lot   some   a little   none |
| <sup>D,I</sup> television                                                  | a lot   some   a little   none |
| <sup>D,I</sup> radio                                                       | a lot   some   a little   none |
| <sup>I</sup> newspapers                                                    | a lot   some   a little   none |
| <sup>B</sup> magazines specifically about health                           | a lot   some   a little   none |
| <sup>D,I</sup> other magazines                                             | a lot   some   a little   none |
| <sup>D,I</sup> friends /family                                             | a lot   some   a little   none |
| <sup>N</sup> church/religious group                                        | a lot   some   a little   none |
| <sup>I</sup> courses and lectures                                          | a lot   some   a little   none |
| <sup>D,I</sup> internet                                                    | a lot   some   a little   none |
| <sup>H</sup> self-help/patient groups                                      | a lot   some   a little   none |
| <sup>D,I</sup> books/encyclopedias                                         | a lot   some   a little   none |

|                             |                                |
|-----------------------------|--------------------------------|
| <sup>N</sup> the library    | a lot   some   a little   none |
| <sup>N</sup> other/comments |                                |

**<sup>D</sup>Please indicate how much you *trust* health information from each of the following sources<sup>1</sup>:**

|                                                                            |                                |
|----------------------------------------------------------------------------|--------------------------------|
| <sup>D,I</sup> direct contact with a health professional                   | a lot   some   a little   none |
| <sup>D,I</sup> pharmacy                                                    | a lot   some   a little   none |
| <sup>C</sup> leaflets at the doctor's office (such as in the waiting room) | a lot   some   a little   none |
| <sup>C</sup> telephone help line                                           | a lot   some   a little   none |
| <sup>D,I</sup> television                                                  | a lot   some   a little   none |
| <sup>D,I</sup> radio                                                       | a lot   some   a little   none |
| <sup>I</sup> newspapers                                                    | a lot   some   a little   none |
| <sup>B</sup> magazines specifically about health                           | a lot   some   a little   none |
| <sup>D,I</sup> other magazines                                             | a lot   some   a little   none |
| <sup>D,I</sup> friends /family                                             | a lot   some   a little   none |
| <sup>N</sup> church/religious group                                        | a lot   some   a little   none |
| <sup>I</sup> courses and lectures                                          | a lot   some   a little   none |
| <sup>D,I</sup> internet                                                    | a lot   some   a little   none |
| <sup>H</sup> self-help/patient groups                                      | a lot   some   a little   none |
| <sup>D,I</sup> books/encyclopedias                                         | a lot   some   a little   none |
| <sup>N</sup> the library                                                   | a lot   some   a little   none |
| <sup>N</sup> other/comments                                                |                                |

#### Section 4: Searching for health information

People often have questions about health. This section is about searching for information beyond what your doctor provides to you. You may have asked a health professional for more information, or asked someone other than a doctor (such as family, friends, classes, or a patient support group). You may have searched on the internet, or looked for written information (such as in magazines or at the library). Please tell us if you have *sought* additional information, even if you didn't find what you were looking for. Check all that apply.

**<sup>D</sup>In the last 12 months, I have sought health information:**

|                                                            |                                                                                                                  |
|------------------------------------------------------------|------------------------------------------------------------------------------------------------------------------|
| <sup>H,I</sup> to decide whether I need to see a doctor    | no   yes [If yes, how?: asked a health professional   asked other people   on the internet   written materials ] |
| <sup>H,I</sup> to prepare for an appointment               | no   yes [If yes, how?: asked a health professional   asked other people   on the internet   written materials ] |
| <sup>H,I</sup> to look up information after an appointment | no   yes [If yes, how?: asked a health professional   asked other people   on the internet   written materials ] |

**<sup>D</sup>I have sought health information about:**

|                                                                          |                                                                                                                  |
|--------------------------------------------------------------------------|------------------------------------------------------------------------------------------------------------------|
| <sup>D,I</sup> specific symptoms, to find out what might be causing them | no   yes [If yes, how?: asked a health professional   asked other people   on the internet   written materials ] |
| <sup>G</sup> prognosis                                                   | no   yes [If yes, how?: asked a health professional   asked other people   on the internet   written materials ] |
| <sup>G</sup> treatment options                                           | no   yes [If yes, how?: asked a health professional   asked other people   on the internet   written materials ] |
| <sup>D</sup> prescription drugs                                          | no   yes [If yes, how?: asked a health professional   asked other people   on the internet   written materials ] |
| <sup>G</sup> side effects of treatment or medication                     | no   yes [If yes, how?: asked a health professional   asked other people   on the internet   written materials ] |
| <sup>G</sup> coping with a disease                                       | no   yes [If yes, how?: asked a health professional   asked other                                                |

<sup>1</sup> Respondents commented that the phrasing of this question did not distinguish between "I don't use this source because I don't trust it" and "I don't know if I trust this source, because I don't use it." The authors suggest adding a "not applicable" option to these questions.

|                                                                                                             |                                                                                                                                                                                 |
|-------------------------------------------------------------------------------------------------------------|---------------------------------------------------------------------------------------------------------------------------------------------------------------------------------|
|                                                                                                             | people   on the internet   written materials ]                                                                                                                                  |
| <sup>A</sup> practical care information (e.g. bathing, first aid, etc.)                                     | no   yes [If yes, how?: asked a health professional   asked other people   on the internet   written materials ]                                                                |
| <sup>B,D</sup> nutrition/physical exercise                                                                  | no   yes [If yes, how?: asked a health professional   asked other people   on the internet   written materials ]                                                                |
| <sup>N</sup> If I have a need for information, I prefer to (please choose 1 option):                        | I don't search for health-related information<br>Ask a health professional<br>Search on the internet<br>Search using sources other than the internet (magazines, friends, etc.) |
| <sup>F</sup> I often want more health information but don't know where to find it                           | strongly agree   agree   disagree   strongly disagree                                                                                                                           |
| <sup>C</sup> I expect my doctor/health professionals to provide me with all of the information that I need. | strongly agree   agree   disagree   strongly disagree                                                                                                                           |
| <sup>E</sup> I have had difficulty finding health information in my primary language                        | never   once   sometimes   often                                                                                                                                                |

### Section 5: Consequences of health information seeking (Results previously published in [L])

#### <sup>I</sup> Has the health-related information you found led to:

|                                                                                             |                                  |
|---------------------------------------------------------------------------------------------|----------------------------------|
| <sup>D</sup> deciding <i>to see</i> a doctor                                                | never   once   sometimes   often |
| <sup>H</sup> deciding <i>not to see</i> a doctor                                            | never   once   sometimes   often |
| <sup>D</sup> a conversation with a doctor about what I found                                | never   once   sometimes   often |
| <sup>H,I</sup> willingness to change diet/lifestyle habits                                  | never   once   sometimes   often |
| <sup>H,I</sup> change of medicine without consulting a health professional                  | never   once   sometimes   often |
| <sup>H,I</sup> feelings of anxiety                                                          | never   once   sometimes   often |
| <sup>H,I</sup> feelings of reassurance or relief                                            | never   once   sometimes   often |
| <sup>H,I</sup> suggestions/queries about a diagnosis                                        | never   once   sometimes   often |
| <sup>H</sup> suggestions/queries about a treatment                                          | never   once   sometimes   often |
| <sup>E</sup> more knowledge and understanding of a specific condition, disease or treatment | never   once   sometimes   often |
| <sup>N</sup> feeling more confused about a specific condition, disease, or treatment        | never   once   sometimes   often |

other/comment \_\_\_\_\_

[ ] Someone helped me with filling in this questionnaire

## References

- A. Kernisan LP1, Sudore RL, Knight SJ. Information-seeking at a caregiving website: a qualitative analysis. *J Med Internet Res*. 2010 Jul 28;12(3):e31. doi: 10.2196/jmir.1548.
- B. Taha J, Sharit J, Czaja S. Use of and satisfaction with sources of health information among older Internet users and nonusers. *Gerontologist* 2009; 49(5): 663-73.

- C. Rokade A, Kapoor PK, Rao S, Rokade V, Reddy KT, Kumar BN. Has the internet overtaken other traditional sources of health information? Questionnaire survey of patients attending ENT outpatient clinics. *Clin Otolaryngol Allied Sci.* 2002 Dec;27(6):526-8.
- D. Rideout VJ, Neuman T, Kitchman M, Brodie M, The Kaiser Foundation. E-health and the elderly: How seniors use the internet for health information: Key findings from a national survey of older Americans. 2005  
D1. modified from (D)
- E. Zhang, Y, Jones B, Spalding M, Young R, Ragain M. Use of the internet for health information among primary care patients in rural West Texas. *South Med J*, 2009. 102(6): p. 595-601.  
Questions in this study were derived from Baker L, Wagner TH, Singer S, et al. Use of the Internet and e-mail for health care information: results from a national survey. *JAMA* 2003;289:2400–2406.
- F. Ybarra, ML, Suman M. Help seeking behavior and the Internet: a national survey. *Int J Med Inform*, 2006. 75(1): p. 29-41.
- G. Castleton K, Fong T, Wang-Gillam A, Waqar MA, Jeffe DB, Kehlenbrink L, Gao F, Govindan R. A survey of Internet utilization among patients with cancer. *Support Care Cancer*. 2011 Aug;19(8):1183-90. doi: 10.1007/s00520-010-0935-5.
- H. Dumitru RC, Bürkle T, Potapov S, Lausen B, Wiese B, Prokosch HU. Use and perception of internet for health related purposes in Germany: results of a national survey. *Int J Public Health*, 2007. 52(5): p. 275-85.
- I. Andreassen HK1, Bujnowska-Fedak MM, Chronaki CE, Dumitru RC, Pudule I, Santana S, Voss H, Wynn R. J. European citizens' use of E-health services: a study of seven countries. *BMC Public Health*. 2007 Apr 10;7:53.
- J. Simon D1, Kriston L, Loh A, Spies C, Scheibler F, Wills C, Härter M. Confirmatory factor analysis and recommendations for improvement of the Autonomy-Preference-Index (API). *Health Expect*. 2010 Sep;13(3):234-43. doi: 10.1111/j.1369-7625.2009.00584.x.
- K. Ende J1, Kazis L, Ash A, Moskowitz MA. Measuring patients' desire for autonomy: decision making and information-seeking preferences among medical patients. *J Gen Intern Med*. 1989 Jan-Feb;4(1):23-30.
- L. Medlock S, Eslami S, Askari M, Sent D, de Rooij SE, Abu-Hanna A. The consequences of seniors seeking health information using the internet and other sources. *Stud Health Technol Inform*. 2013;192:457-60.
- N. new
